# Supplementary material
Source: PubMed Central journal article supplement (PMC6014539)
Supplement: DC171683SupplementaryData.pdf [file DC171683SupplementaryData.pdf]

SUPPLEMENTARY DATA

**Supplementary Figure 1.** Flowchart of Wounds Included in Cox Analyses

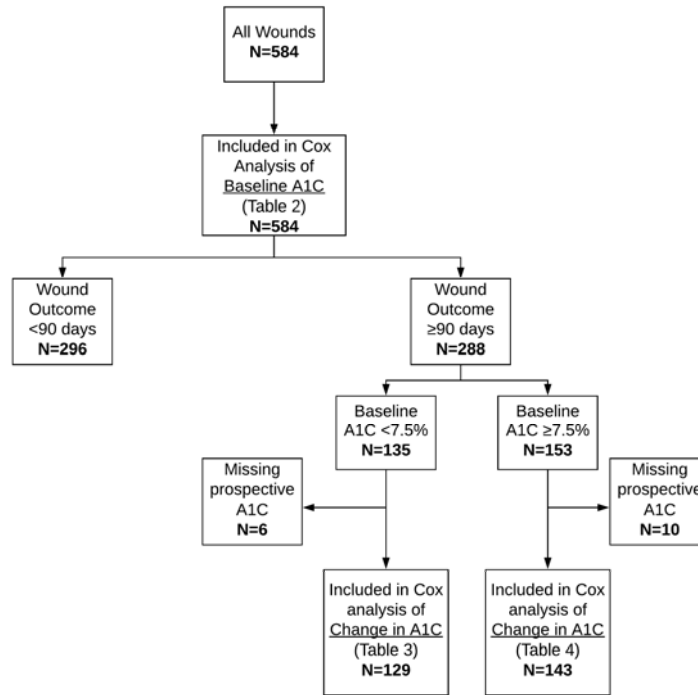

SUPPLEMENTARY DATA

**Supplementary Table 1.** Baseline Characteristics of All Wounds by Wound Outcome

| Characteristics                    | All Wounds            |                   |               |
|------------------------------------|-----------------------|-------------------|---------------|
|                                    | Not Healed<br>N = 134 | Healed<br>N = 450 | All<br>N= 584 |
| Time to Wound Outcome, days        | 103.0 (146)           | 80.0 (113)        | 85.0 (126)    |
| Female/Male, %                     | 37.3/62.7             | 38.2/61.8         | 38.0/62.0     |
| Age, years                         | 58.5 (15.5)           | 57.1 (15.8)       | 57.2 (15.8)   |
| Race*, %                           |                       |                   |               |
| White/Caucasian                    | 49.6                  | 32.7              | 36.5          |
| Black                              | 45.1                  | 64.9              | 60.4          |
| Other                              | 5.3                   | 2.4               | 3.1           |
| BMI †, kg/m <sup>2</sup>           | 29.0 (12.1)           | 31.1 (10.7)       | 30.7 (11.1)   |
| Type 1/ Type 2 Diabetes Mellitus,  | 8.2/91.8              | 4.7/95.3          | 5.5/94.5      |
| Diabetes duration, years           | 15.2 (12.9)           | 15.4 (13.3)       | 15.3 (13.3)   |
| Baseline A1C, %                    | 7.7 (3.1)             | 7.9 (3.5)         | 7.8 (3.4)     |
| Nadir A1C, %                       | 6.9 (2.2)             | 7 (1.9)           | 7 (2.0)       |
| Mean A1C, %                        | 7.4 (2.8)             | 7.6 (2.6)         | 7.6 (2.7)     |
| Nadir A1C Change from Baseline     | -0.3 (1.2)            | -0.4 (1.5)        | -0.4 (1.4)    |
| Mean A1C Change from Baseline      | -0.13 (0.6)           | -0.07 (1.2)       | -0.1 (1)      |
| Target A1C, %                      |                       |                   |               |
| <7.0%                              | 32.8                  | 36.0              | 35.3          |
| 7.0% - 7.5%                        | 67.2                  | 64.0              | 64.7          |
| Observed/Expected A1C (IOR) per    | 1 (0.2)               | 1(0.2)            | 1 (0.2)       |
| Number (%) with >1 prospective     | 120 (89.6)            | 390 (86.7)        | 510 (87.3)    |
| Antihyperglycemic medications, %   |                       |                   |               |
| Metformin                          | 30.6                  | 37.3              | 35.8          |
| DPP-4 inhibitors                   | 7.5                   | 4.9               | 5.5           |
| GLP-1 agonists                     | 2.2                   | 1.6               | 1.7           |
| Thiazolidenediones                 | 0.8                   | 0.2               | 0.3           |
| SGLT-2 inhibitors                  | 0                     | 0                 | -             |
| Sulfonylureas                      | 13.4                  | 14.9              | 14.6          |
| Sulfonylurea types, %              |                       |                   |               |
| Glyburide                          | 0                     | 9.8               | 7.7           |
| Glimepiride                        | 47.1                  | 27.9              | 32.1          |
| Glipizide                          | 52.9                  | 62.3              | 60.3          |
| Insulin, %                         | 76.1                  | 62.2              | 65.4          |
| Total insulin dose (units/kg/day), |                       |                   |               |
| 0.00                               | 22.4                  | 37.0              | 33.6          |

SUPPLEMENTARY DATA

| Characteristics                 | All Wounds            |                   |                |
|---------------------------------|-----------------------|-------------------|----------------|
|                                 | Not Healed<br>N = 134 | Healed<br>N = 450 | All<br>N= 584  |
| 0.07-0.53                       | 26.9                  | 35.2              | 33.3           |
| 0.53-3.28                       | 50.8                  | 27.8              | 33.1           |
| Comorbidities, %                |                       |                   |                |
| Coronary artery disease         | 26.9                  | 22.2              | 23.3           |
| Prior myocardial infarction     | 11.9                  | 12.9              | 12.7           |
| Peripheral vascular disease     | 50.8                  | 40.0              | 42.5           |
| Prior amputation                | 26.9                  | 37.6              | 35.1           |
| Hypertension                    | 82.1                  | 84.0              | 83.6           |
| Loss of protective sensation    | 94.8                  | 94.4              | 94.5           |
| Retinopathy                     | 29.9                  | 20.1              | 22.6           |
| Dialysis                        | 18.7                  | 8.9               | 11.1           |
| Prior kidney transplant         | 12.7                  | 7.1               | 8.4            |
| eGFR <sub>‡</sub> categories, % |                       |                   |                |
| G1 - 2                          | 34.4                  | 28.4              | 29.8           |
| G3                              | 24.0                  | 35.8              | 33.0           |
| G4                              | 16.8                  | 20.2              | 19.4           |
| G5                              | 24.8                  | 15.6              | 17.8           |
| Current smoker, %               | 66.4                  | 55.6              | 58.1           |
| WIFI§ stage, %                  |                       |                   |                |
| 1                               | 17.9                  | 35.8              | 31.7           |
| 2                               | 14.9                  | 18.4              | 17.6           |
| 3                               | 29.9                  | 28.2              | 28.6           |
| 4                               | 37.3                  | 17.6              | 22.1           |
| Uninfected wounds at baseline   |                       |                   |                |
| No antibiotics, N (%)           | 49/61 (80.3)          | 198/233 (85.0)    | 247/294 (84.0) |
| Antibiotic Use, N (%)           | 12/61 (19.7)          | 35/233 (15.0)     | 47/294 (16.0)  |
| Infected wounds at baseline     |                       |                   |                |
| No antibiotics, N (%)           | 0/73 (0)              | 2/217 (0.9)       | 2/290 (0.7)    |
| Antibiotic use, N (%)           | 73/73 (100)           | 215/217 (99.1)    | 288/290 (99.3) |
| Antibiotic use, %               | 63.4                  | 55.6              | 57.4           |
| Wound intervention, %           |                       |                   |                |
| Wound care                      | 43.3                  | 40.0              | 40.8           |
| Surgery                         | 56.7                  | 60.0              | 59.2           |

Data are mean ± standard deviation or median (interquartile range, IQR). *P*-values were calculated using Students *t* test for continuous variables with normal distribution and Wilcoxon rank sum test for non-normally distributed variables. *P*-values not reported for “All Wounds” because of lack of independence of characteristics for multiple wounds per participant. Bolded= *P*<0.05. Fisher’s exact test or  $\chi^2$

## SUPPLEMENTARY DATA

tests were used for categorical variables. \*Race missing 1 observation in Not Healed category. †BMI missing 1 observation in Healed category. ‡eGFR laboratory result missing for 9 observations in Not Healed category and 45 observations in Healed category. §WIFI = Wound, Ischemia, and Foot Infection classification of the Society for Vascular Surgery.

SUPPLEMENTARY DATA

**Supplementary Table 2.** Baseline Characteristics of Wounds by Long-Term ( $\geq 90$  days) Wound Outcome Stratified by Baseline A1C Status (One Random Wound Per Participant)

| Characteristics                         | One Wound Per Participant (Random) |                 |                 |          |                           |                 |                 |             |
|-----------------------------------------|------------------------------------|-----------------|-----------------|----------|---------------------------|-----------------|-----------------|-------------|
|                                         | Baseline A1C <7.5%                 |                 |                 |          | Baseline A1C $\geq 7.5\%$ |                 |                 |             |
|                                         | Not Healed                         | Healed          | All             | *P-value | Not Healed                | Healed          | All             | *P-Value    |
| Wounds, N                               | 14                                 | 40              | 54              |          | 23                        | 58              | 81              |             |
| Time to Wound Outcome, days             | 154 (78)                           | 185 (141)       | 174 (132)       | 0.40     | 119 (84)                  | 170 (154)       | 164 (133)       | <b>0.02</b> |
| Female/Male, %                          | 35.7/64.3                          | 40.0/60.0       | 38.9/61.1       | 0.77     | 60.9/39.1                 | 44.8/55.2       | 49.4/50.6       | 0.19        |
| Age, years                              | 64.3 $\pm$ 13.8                    | 60.5 $\pm$ 11.2 | 61.5 $\pm$ 11.9 | 0.32     | 60.0 $\pm$ 10.5           | 54.7 $\pm$ 11.3 | 56.2 $\pm$ 11.3 | 0.06        |
| Race <sup>†</sup> , %                   |                                    |                 |                 | 0.71     |                           |                 |                 | 0.46        |
| White/Caucasian                         | 50.0                               | 40.0            | 42.6            |          | 30.4                      | 20.7            | 23.5            |             |
| Black                                   | 50.0                               | 57.5            | 55.6            |          | 69.6                      | 75.9            | 74.1            |             |
| Other                                   | 0.0                                | 2.5             | 1.9             |          | 0.0                       | 3.5             | 2.5             |             |
| BMI <sup>‡</sup> , kg/m <sup>2</sup>    | 34.2 (12.2)                        | 31.2 (13.7)     | 32.7 (13.4)     | 0.65     | 31.7 (14.1)               | 32.1 (9.9)      | 32.0 (10.4)     | 0.85        |
| Type 1/ Type 2 Diabetes Mellitus, %     | 0/100                              | 12.5/87.5       | 9.3/90.7        | 0.17     | 8.7/91.3                  | 5.2/94.8        | 6.2/93.8        | 0.55        |
| Diabetes duration, years                | 16.8 $\pm$ 8.2                     | 18.9 $\pm$ 11.3 | 18.4 $\pm$ 10.6 | 0.53     | 18.1 (28.3)               | 18.1 (11.0)     | 18.1(12.6)      | 0.62        |
| Baseline A1C,%                          | 6.3 $\pm$ 0.7                      | 6.3 $\pm$ 0.7   | 6.3 $\pm$ 0.7   | 0.91     | 10.1 (4.1)                | 9.8 (2.4)       | 9.8 (2.9)       | 0.70        |
| Nadir A1C, %                            | 6.2 (1.1)                          | 6.2 (1.0)       | 6.2 (1.0)       | 0.80     | 7.4 (3.2)                 | 7.6 (2.4)       | 7.6 (2.8)       | 0.64        |
| Mean A1C, %                             | 6.4 (1.9)                          | 6.5 (1.2)       | 6.5 (1.1)       | 0.39     | 8.9 (2.4)                 | 8.3 (2.1)       | 8.3 (2.7)       | 0.80        |
| Nadir A1C Change from Baseline          | -0.1 (0.6)                         | 0.0 (0.7)       | 0.0 (0.5)       | 0.35     | -2.6 (2.3)                | -1.5 (1.1)      | -1.9 (2.7)      | 0.07        |
| Mean A1C Change from Baseline           | 0.0 (0.5)                          | 0.1 (1.6)       | 0.0 (0.6)       | 0.08     | -1.5 (2.8)                | -0.7 (2.7)      | -0.9 (2.6)      | 0.14        |
| Target A1C, %                           |                                    |                 |                 | 0.78     |                           |                 |                 | 0.12        |
| <7.0%                                   | 14.3                               | 17.5            | 16.7            |          | 26.1                      | 44.8            | 39.5            |             |
| 7.0% - 7.5%                             | 85.7                               | 82.5            | 83.3            |          | 73.9                      | 55.2            | 60.5            |             |
| Observed/Expected A1C (IQR) per 90-days | 0.9 (0.9)                          | 1.1 (0.9)       | 1.0 (0.9)       | 0.21     | 1.2 (0.8)                 | 1.3 (0.6)       | 1.3 (0.7)       | 0.82        |
| Number (%) with $\geq 1$                | 14                                 | 36 (90.0)       | 50 (92.6)       | 0.22     | 21 (91.3)                 | 54 (93.1)       | 75 (92.6)       | 0.78        |

SUPPLEMENTARY DATA

|                                       |              |             |            |      |            |            |             |             |
|---------------------------------------|--------------|-------------|------------|------|------------|------------|-------------|-------------|
| prospective A1C                       | (100.0)      |             |            |      |            |            |             |             |
| Antihyperglycemic medications, %      |              |             |            |      |            |            |             |             |
| Metformin                             | 21.4         | 32.5        | 29.6       | 0.44 | 21.7       | 32.8       | 29.6        | 0.33        |
| DPP-4 inhibitors                      | 0.0          | 7.5         | 5.6        | 0.56 | 8.7        | 5.2        | 6.2         | 0.62        |
| GLP-1 agonists                        | 0.0          | 0.0         | 0.0        | -    | 0.0        | 0.0        | 0.0         | -           |
| Thiazolidenediones                    | 0.0          | 2.5         | 1.9        | 1.00 | 0.0        | 0.0        | 0.0         | -           |
| SGLT-2 inhibitors                     | 0.0          | 0.0         | 0.0        | -    | 0.0        | 0.0        | 0.0         | -           |
| Sulfonylureas                         | 7.1          | 10.0        | 9.3        | 1.00 | 21.7       | 15.5       | 17.3        | 0.53        |
| Sulfonylurea types, n (%)             |              |             |            | 0.20 |            |            |             | 0.46        |
| Glyburide                             | 0/1 (0.0)    | 0/4 (0.0)   | 0/5 (0.0)  |      | 0/5 (0.0)  | 2/8 (25.0) | 2/13 (15.4) |             |
| Glimepiride                           | 1/1/ (100.0) | 0/4 (0.0)   | 1/5 (20.0) |      | 3/5 (60.0) | 2/8 (25.5) | 5/13 (38.4) |             |
| Glipizide                             | 0/1 (0.0)    | 4/4 (100.0) | 4/5 (80.0) |      | 2/5 (40.)  | 4/8 (50.0) | 6/13(46.2)  |             |
| Insulin, %                            | 57.1         | 45.0        | 48.2       | 0.43 | 87.0       | 82.8       | 84.0        | 0.64        |
| Total insulin dose† (units/kg/day), % |              |             |            | 0.62 |            |            |             | <b>0.02</b> |
| Tertile 1                             | 42.9         | 56.4        | 52.8       |      | 21.7       | 37.9       | 33.3        |             |
| Tertile 2                             | 21.4         | 12.8        | 15.1       |      | 21.7       | 37.9       | 33.3        |             |
| Tertile 3                             | 35.7         | 30.8        | 32.1       |      | 56.5       | 24.1       | 33.3        |             |
| Comorbidities, %                      |              |             |            |      |            |            |             |             |
| Coronary artery disease               | 34.8         | 20.7        | 24.7       | 0.19 | 34.8       | 20.7       | 24.7        | 0.19        |
| Prior myocardial infarction           | 17.4         | 13.8        | 14.8       | 0.68 | 17.4       | 13.8       | 14.8        | 0.68        |
| Peripheral vascular disease           | 52.2         | 39.7        | 43.2       | 0.31 | 52.2       | 39.7       | 43.2        | 0.31        |
| Prior amputation                      | 26.1         | 25.9        | 25.9       | 0.98 | 26.1       | 25.9       | 25.9        | 0.98        |
| Hypertension                          | 95.7         | 86.2        | 88.9       | 0.22 | 95.7       | 86.2       | 88.9        | 0.22        |
| Loss of protective sensation (LOPS)   | 100.0        | 91.4        | 93.8       | 0.15 | 100.0      | 91.4       | 93.8        | 0.15        |
| Retinopathy                           | 34.8         | 24.1        | 27.2       | 0.33 | 34.8       | 24.1       | 27.2        | 0.33        |
| Dialysis                              | 8.7          | 6.9         | 7.41       | 0.78 | 8,7        | 6.9        | 7.4         | 0.78        |
| Prior kidney transplant               | 8.7          | 3.5         | 4.9        | 0.33 | 8.7        | 3.5        | 4.9         | 0.33        |

SUPPLEMENTARY DATA

|                                         |               |               |               |             |               |               |               |             |
|-----------------------------------------|---------------|---------------|---------------|-------------|---------------|---------------|---------------|-------------|
| eGFR   categories, %                    |               |               |               | 0.56        |               |               |               | 0.56        |
| G1 - 2                                  | 22.7          | 32.1          | 29.5          |             | 22.7          | 32.1          | 29.5          |             |
| G3                                      | 22.7          | 28.6          | 26.9          |             | 22.7          | 28.6          | 26.9          |             |
| G4                                      | 36.4          | 21.4          | 25.6          |             | 36.4          | 21.4          | 25.6          |             |
| G5                                      | 18.2          | 17.9          | 18.0          |             | 18.2          | 17.9          | 18.0          |             |
| Current smoker, %                       | 65.2          | 50.0          | 54.3          | 0.22        | 65.2          | 50.0          | 54.3          | 0.22        |
| Wifi†   stage, %                        |               |               |               | <b>0.02</b> |               |               |               | <b>0.02</b> |
| 1                                       | 4.4           | 27.6          | 21.0          |             | 4.3           | 27.6          | 21.0          |             |
| 2                                       | 8.7           | 12.1          | 11.1          |             | 8.7           | 12.1          | 11.1          |             |
| 3                                       | 26.1          | 32.8          | 30.9          |             | 26.1          | 32.7          | 30.9          |             |
| 4                                       | 60.9          | 27.6          | 37.0          |             | 60.9          | 27.6          | 37.0          |             |
| Uninfected wounds at baseline (n=31), % |               |               |               | 0.90        |               |               |               | 0.90        |
| No antibiotics                          | 66.7 (4/6)    | 64.0 (16/25)  | 64.5 (20/31)  |             | 66.7 (4/6)    | 64.0 (16/25)  | 64.5 (20/31)  |             |
| Antibiotic Use                          | 33.3 (2/6)    | 36.0 (9/25)   | 35.5 (11/31)  |             | 33.3 (2/6)    | 36.0 (9/25)   | 35.5 (11/31)  |             |
| Infected wounds at baseline (n=50), %   |               |               |               | -           |               |               |               | -           |
| No antibiotics                          | 0.0           | 0.0           | 0.0           |             | 0.0           | 0.0           | 0.0           |             |
| Antibiotic use                          | 100.0 (17/17) | 100.0 (33/33) | 100.0 (50/50) |             | 100.0 (17/17) | 100.0 (33/33) | 100.0 (50/50) |             |
| Antibiotic use, %                       | 82.6          | 72.4          | 75.3          | 0.34        | 782.6         | 72.4          | 75.3          | 0.34        |
| Wound intervention, %                   |               |               |               | 0.84        |               |               |               | 0.84        |
| Wound care                              | 30.4          | 32.8          | 32.1          |             | 30.4          | 32.8          | 32.1          |             |
| Surgery                                 | 69.6          | 67.2          | 67.9          |             | 69.6          | 67.2          | 67.9          |             |

N= Number of Wounds; data are mean ± standard deviation or median (interquartile range, IQR). \*P-values were calculated using Student's *t* test for continuous variables with normal distribution and Wilcoxon rank sum test for non-normally distributed variables. Fisher's exact test or  $\chi^2$  tests were used for categorical variables. Bolded=  $P < 0.05$ . †Insulin doses (units/kg/day) for A1C <7.5%: tertile 1 (0.0), tertile 2 (0.12-0.27), tertile 3 (0.28-2.31); For A1C  $\geq$ 7.5%, tertile 1 (0.0 – 0.30), tertile 2 (0.31-0.62), tertile 3 (0.62 – 2.54).

SUPPLEMENTARY DATA

**Supplementary Table 3.** Baseline Characteristics of Wounds by Long-Term ( $\geq 90$  days) Wound Outcome Stratified by Baseline A1C Status (All Wounds)

| Characteristics                                                           | One Wound Per Participant (All Wounds) |                 |               |                           |             |             |
|---------------------------------------------------------------------------|----------------------------------------|-----------------|---------------|---------------------------|-------------|-------------|
|                                                                           | Baseline A1C <7.5%                     |                 |               | Baseline A1C $\geq 7.5\%$ |             |             |
|                                                                           | Not Healed                             | Healed          | All           | Not Healed                | Healed      | All         |
| Wounds, N                                                                 | 36                                     | 99              | 135           | 42                        | 111         | 153         |
| Time to Wound Outcome, days                                               | 187.5 (182)                            | 170 (166)       | 179 (178)     | 173 (112)                 | 163 (141)   | 168 (145)   |
| Female/Male, %                                                            | 25.0/75.0                              | 36.4/63.6       | 33.3/66.7     | 47.6/52.4                 | 43.2/56.8   | 44.4/55.6   |
| Age, years                                                                | 59.9 $\pm$ 16.3                        | 60.0 $\pm$ 11.7 | 60.0 $\pm$ 13 | 58.7 (8.8)                | 55.0 (16.2) | 57.2 (13.6) |
| Race†, %                                                                  |                                        |                 |               |                           |             |             |
| White/Caucasian                                                           | 41.7                                   | 41.4            | 41.5          | 52.4                      | 24.3        | 32.0        |
| Black                                                                     | 52.8                                   | 56.6            | 55.6          | 47.6                      | 73.0        | 66.0        |
| Other                                                                     | 5.6                                    | 2.0             | 3.0           | 0.0                       | 2.7         | 2.0         |
| BMI‡, kg/m <sup>2</sup>                                                   | 28.8 (11.9)                            | 31.7 (14.0)     | 31.1 (13.9)   | 33.0 (13.9)               | 31.7 (9.5)  | 31.9 (10.5) |
| Type 1/ Type 2 Diabetes Mellitus, %                                       | 2.8/97.2                               | 9.1/90.9        | 7.4/92.6      | 14.3/85.7                 | 2.7/97.3    | 5.9/94.1    |
| Diabetes duration, years                                                  | 13.8 (10.1)                            | 17.8 (19.7)     | 16.8 (16.3)   | 18.4 (27.8)               | 17.4 (12.6) | 17.9 (12.7) |
| Baseline A1C, %                                                           | 6.5 (0.9)                              | 6.2 (1.1)       | 6.3 (1.0)     | 9.5 (2.5)                 | 10 (4.1)    | 9.7 (3.3)   |
| Nadir A1C, %                                                              | 6.1 (1.0)                              | 6.2 (1.0)       | 6.2 (0.9)     | 7.4 (2.9)                 | 7.3 (1.9)   | 7.4 (2.2)   |
| Mean A1C, %                                                               | 6.4 (0.7)                              | 6.4 (1.2)       | 6.4 (1.0)     | 8.9 (3.1)                 | 8.3 (2.6)   | 8.6 (2.7)   |
| Nadir A1C Change from Baseline                                            | -0.2 (0.7)                             | 0 (0.3)         | 0 (0.5)       | -1.9 (3.1)                | -1.5 (2.7)  | -1.6 (2.8)  |
| Mean A1C Change from Baseline                                             | 0 (0.5)                                | 0.05 (0.9)      | 0 (0.8)       | -0.5 (3.3)                | -0.7 (2.5)  | -0.7 (2.7)  |
| Target A1C, %                                                             |                                        |                 |               |                           |             |             |
| <7.0%                                                                     | 22.2                                   | 15.2            | 17.0          | 21.4                      | 45.1        | 38.6        |
| 7.0% - 7.5%                                                               | 77.8                                   | 84.8            | 83.0          | 78.6                      | 54.9        | 61.4        |
| Observed/Expected A1C (IQR) per 90-days                                   | 0.9 (0.8)                              | 1.2 (0.9)       | 1.0 (1.0)     | 1.2 (0.7)                 | 1.4 (0.8)   | 1.4 (0.8)   |
| Number (%) with $\geq 1$ prospective A1C Antihyperglycemic medications, % | 36 (100.0)                             | 93 (93.9)       | 129 (95.6)    | 39 (92.9)                 | 104 (93.7)  | 143 (93.5)  |



SUPPLEMENTARY DATA

|                                         |       |      |      |      |       |      |
|-----------------------------------------|-------|------|------|------|-------|------|
| Metformin                               | 27.8  | 30.3 | 29.6 | 40.5 | 32.3  | 34.6 |
| DPP-4 inhibitors                        | 5.6   | 6.1  | 5.9  | 16.7 | 4.5   | 7.8  |
| GLP-1 agonists                          | 0.0   | 0.0  | 0.0  | 0.0  | 0.9   | 0.7  |
| Thiazolidenediones                      | 0.0   | 1.0  | 0.74 | 0.0  | 0.0   | 0.0  |
| SGLT-2 inhibitors                       | 0.0   | 0.0  | 0.0  | 0.0  | 0.0   | 0.0  |
| Sulfonylureas                           | 5.6   | 11.1 | 9.6  | 23.8 | 15.3  | 17.7 |
| Sulfonylurea types,<br>n (%)            |       |      |      |      |       |      |
| Glyburide                               | 0.0   | 0.0  | 0.0  | 0.0  | 31.3  | 19.2 |
| Glimepiride                             | 100.0 | 27.3 | 38.5 | 40.0 | 25.0  | 30.8 |
| Glipizide                               | 0.0   | 72.7 | 61.5 | 60.0 | 43.7  | 50.0 |
| Insulin, %                              | 75.0  | 39.4 | 48.9 | 76.2 | 76.6  | 76.5 |
| Total insulin<br>dose*(units/kg/day), % |       |      |      |      |       |      |
| Tertile 1                               | 25.0  | 61.2 | 51.5 | 26.2 | 36.9  | 34.0 |
| Tertile 2                               | 30.6  | 10.2 | 15.7 | 28.6 | 34.2  | 32.7 |
| Tertile 3                               | 44.4  | 28.6 | 32.8 | 45.2 | 28.8  | 33.3 |
| Comorbidities, %                        |       |      |      |      |       |      |
| Coronary artery disease                 | 30.6  | 36.4 | 34.8 | 31.0 | 17.1  | 20.9 |
| Prior myocardial<br>infarction          | 19.4  | 22.2 | 21.5 | 14.3 | 12.6  | 13.1 |
| Peripheral vascular<br>disease          | 61.1  | 58.6 | 59.3 | 54.8 | 43.2  | 46.4 |
| Prior amputation                        | 36.1  | 51.5 | 47.4 | 23.8 | 27.9  | 26.8 |
| Hypertension                            | 72.2  | 90.9 | 85.9 | 97.6 | 86.5  | 89.5 |
| Loss of protective<br>sensation (LOPS)  | 94.4  | 99.0 | 97.8 | 93.7 | 100.0 | 95.4 |
| Retinopathy                             | 30.6  | 22.2 | 24.2 | 35.7 | 20.7  | 24.8 |
| Dialysis                                | 30.6  | 15.2 | 19.3 | 11.9 | 4.5   | 6.5  |
| Prior kidney transplant                 | 11.1  | 10.1 | 10.4 | 9.5  | 2.7   | 4.6  |
| eGFR   categories, %                    |       |      |      |      |       |      |
| G1 - 2                                  | 25.0  | 22.8 | 23.4 | 26.8 | 25.2  | 25.7 |
| G3                                      | 25.0  | 25.0 | 25.0 | 24.4 | 40.2  | 35.8 |
| G4                                      | 12.5  | 32.6 | 27.4 | 29.3 | 21.5  | 23.7 |
| G5                                      | 37.5  | 19.6 | 24.2 | 19.5 | 13.1  | 14.9 |
| Current smoker, %                       | 80.6  | 54.6 | 61.5 | 59.5 | 50.5  | 52.9 |

SUPPLEMENTARY DATA

|                                         |               |               |               |               |               |               |
|-----------------------------------------|---------------|---------------|---------------|---------------|---------------|---------------|
| Wound stage, %                          |               |               |               |               |               |               |
| 1                                       | 16.7          | 33.3          | 28.9          | 2.4           | 26.1          | 19.6          |
| 2                                       | 19.4          | 10.1          | 12.6          | 4.8           | 11.7          | 9.8           |
| 3                                       | 38.9          | 24.2          | 28.2          | 33.3          | 33.3          | 33.3          |
| 4                                       | 25.0          | 32.3          | 30.4          | 59.5          | 28.8          | 37.3          |
| Uninfected wounds at baseline (n=54), % |               |               |               |               |               |               |
| No antibiotics                          | 88.2 (15/17)  | 84.2 (48/57)  | 85.1 (63/74)  | 80.0 (8/10)   | 70.5 (31/44)  | 72.2 (39/54)  |
| Antibiotic Use                          | 11.8 (2/17)   | 15.8 (9/57)   | 14.8 (11/74)  | 20.0 (2/10)   | 29.5 (13/44)  | 27.8 (15/54)  |
| Infected wounds at baseline (n=99), %   |               |               |               |               |               |               |
| No antibiotics                          | 0.0           | 0.0           | 0.0           | 0.0           | 0.0           | 0.0           |
| Antibiotic use                          | 100.0 (19/19) | 100.0 (42/42) | 100.0 (61/61) | 100.0 (32/32) | 100.0 (67/67) | 100.0 (99/99) |
| Antibiotic use, %                       | 58.3          | 51.5          | 53.3          | 81.0          | 72.1          | 74.5          |
| Wound intervention, %                   |               |               |               |               |               |               |
| Wound care                              | 38.9          | 24.2          | 28.2          | 33.3          | 27.9          | 29.4          |
| Surgery                                 | 61.1          | 75.8          | 71.8          | 66.7          | 72.1          | 70.6          |

N= Number of Wounds; data are mean ± standard deviation or median (interquartile range, IQR). *P*-values not reported for “All Wounds” because of lack of independence of characteristics for multiple wounds per participant. \*Insulin doses (units/kg/day) for A1C <7.5%: tertile 1 (0.0), tertile 2 (0.11-0.24), tertile 3 (0.25-3.30); For A1C ≥7.5%, tertile 1 (0.0 – 0.25), tertile 2 (0.26-0.56), tertile 3 (0.57 – 3.28).
